# Supplementary material
Source: PubMed Central journal article supplement (PMC5960279)
Supplement: pnas.1714511115.sapp.pdf [file pnas.1714511115.sapp.pdf]

1 **Supplementary Information**

2  
3 **Appendix S.1. Additional background information**

- 4 1. Additional background  
5 2. References associated with additional background  
6

7 **Appendix S.2. Additional information for methods**

- 8 1. Description of data  
9 2. Statistical analysis  
10 3. References associated with methods  
11 4. Figure S1. Map of all studies (n=27) included in the analysis.  
12 5. Figure S2. Estimating phenological change using a hinge model and linear model for  
13 two interactions.  
14 6. Figure S3. Phenological sensitivity to temperature and temperature change across  
15 datasets.  
16 7. Table S1- List of species interactions for which temperature change and sensitivity were  
17 estimated.  
18 8. Table S2. List of studies with temperature data that came from the same weather station  
19 location.  
20 9. Table S3. List of studies with temperature data across multiple sites.  
21

22 **Appendix S.3. Additional analyses**

- 23 1. Proof of concept: Comparisons of our approach with original studies.  
24 2. Insensitivity of results to alternative inflection points.  
25 3. Influence of methodological differences of studies on results.  
26 4. Influence of changes in population size on results  
27 5. Figure S4. Relationship between the (a) magnitude of synchrony change and first year  
28 of study and (b) first year of study and latitude.  
29 6. Table S4. A comparison of some phenological shift estimates between our paper and  
30 original studies.  
31 7. Table S5. A comparison of some synchrony change estimates between our paper and  
32 original studies.  
33 8. Table S6. Relationship between synchrony and temperature change, and methodological  
34 differences across studies.  
35 9. Table S7. Relationship between first year of study, length of time series, synchrony  
36 change and latitude of study.  
37

38 **Appendix S.4. Study and species information**

- 39 1. Table S8. Data-series characteristics for interacting species in the phenology and  
40 synchrony change analyses.  
41 2. Bibliographic information for studies used in analysis  
42

43 **Appendix S.5. Stan code**

- 44 1. Model 1. Model used to estimate change in phenology, synchrony and temperature,  
45 and temperature sensitivity.

46  
47  
48  
49  
50  
51  
52

2. Model 2. Model used to estimate the overall response in the magnitude of synchrony change.
3. Model 3. Model used to estimate the relationship between temperature change and change in phenology across interactions (i.e. covariate models).
4. Model 4. Model used to estimate the relationship between temperature change and change in synchrony across interactions (i.e. covariate models).

## 53 **Appendix S.1. Additional background information**

### 54 A. ADDITIONAL BACKGROUND

55 It is commonly thought that warming will lead to changes in synchrony (1-3). These  
56 changes are expected to be prevalent because (i) temperature is an important phenological cue  
57 for many taxonomic groups (4), (ii) the temperature sensitivity of phenology of interacting  
58 species can differ (5,6) and, (iii) global temperatures have increased on average by 0.85°C since  
59 1880 (7). Indeed, there is evidence from single-systems, as well as from reviews (8,9), that many  
60 interacting species are shifting their phenologies at different rates, leading to changes in  
61 synchrony (10-13). To date, however, there have been no quantitative assessments of shifts  
62 across studies for species that directly interact—leaving open the question of how prevalent and  
63 large such shifts may be. Indeed, another set of studies that span observational evidence,  
64 theoretical considerations, and small-scale experiments suggest that maintenance of synchrony in  
65 the context of environmental change could be common (14-19). There are examples from  
66 directly interacting species that show synchrony has been sustained (20-21). Others show that the  
67 degree of changes in synchrony can vary across populations (22-24) or has been less than  
68 expected (25,26). These examples question whether shifts toward asynchrony should be  
69 widespread (14,27,28).

70 From an evolutionary-perspective, it is not clear that species interactions should  
71 necessarily move towards asynchrony during environmental change. Species in different types of  
72 interactions are likely to have evolved different types of responses to environmental cues making  
73 it difficult to make predictions about the likelihood of asynchrony based on more general  
74 associations (14, 29). For example, we should expect differences in the strength of natural  
75 selection on synchrony between specialized interactions and less closely interacting species.  
76 There is likely to be strong selection on processes governing phenological synchrony among  
77 pairs of closely interacting species (30, 31). Maintenance of synchrony in consumer-resource  
78 interactions could be a result of selection pressures from shifts in the timing of resource  
79 availability to minimize changes in synchrony (28,32). For mutualistic interactions, there should  
80 be strong selection for the two to use the same cues, or at least cues that have historically been  
81 strongly correlated (29, 33). For non-trophic interactions (e.g. competition), interacting species  
82 are likely to be influenced by shared environmental factors (14). In other systems, asynchrony  
83 might be more adaptive than synchrony making it difficult to anticipate how synchrony will  
84 change (31,34).

85 In many systems, there is limited knowledge about the relative importance of  
86 environmental cues controlling phenology for both partners in an interaction (20, 35), making it  
87 difficult to predict how they will respond to changing environmental conditions. Moreover,  
88 phenological responses are a function of both organismal mechanisms (e.g., environmental cues)  
89 and environmental mechanisms (e.g., degree, seasonality of temperature change). For example,  
90 even if interacting taxa respond to different cues or respond to the same cues but at different  
91 rates, their responses may still be in the same direction and of a similar magnitude, thereby  
92 maintaining their phenological synchrony over a range of abiotic conditions, given the  
93 complexity and multidimensional nature of how cues are changing with climate change (e.g.,  
94 interannual variation vs. long-term directional change, a change in one cue but not another; 20).  
95 In conclusion, it is difficult to predict the prevalence and magnitude of shifts in synchrony *a*

96 *priori* and an analysis that directly compares the phenological responses of interacting species is  
97 needed.

98

## 99 B. REFERENCES ASSOCIATED WITH ADDITIONAL BACKGROUND

- 100 1. Harrington R, Woiwod I, Sparks T (1999) Climate change and trophic interactions. *Trends*  
101 *Ecol Evol* 14:146-150.
- 102 2. Stenseth NC, Mysterud A (2002) Climate, changing phenology, and other life history traits:  
103 nonlinearity and match–mismatch to the environment. *Proc Natl Acad Sci USA* 99:13379-  
104 13381.
- 105 3. Visser ME, Both C, Lambrechts MM (2004) Global climate change leads to mistimed avian  
106 reproduction. *Adv Ecol Res* 35:89-110.
- 107 4. Pau S, et al. (2011) Predicting phenology by integrating ecology, evolution and climate  
108 science. *Glob. Change Biol* 17:3633-3643.
- 109 5. Thackeray SJ, et al. (2016) Phenological sensitivity to climate across taxa and trophic levels.  
110 *Nature* 535:241-245.
- 111 6. Kharouba HM, Vellend M (2015) Flowering time of butterfly nectar food plants is more  
112 sensitive to temperature than the timing of butterfly adult flight. *J Anim Ecol* 84:1311-1321.
- 113 7. Stocker TF, et al. (IPCC, 2013) *Climate Change 2013: The Physical Science Basis* 1535 pp.
- 114 8. Visser ME, Both C (2005). Shifts in phenology due to global climate change: the need for a  
115 yardstick. *Philos. Trans. R. Soc. London B* 272:2561-2569.
- 116 9. Donnelly A, Caffarra A, O’Neill BF (2011) A review of climate-driven mismatches between  
117 interdependent phenophases in terrestrial and aquatic ecosystems. *Int. J. Biometeorol.*  
118 55:805-817.
- 119 10. Post E, Forchhammer MC (2008) Climate change reduces reproductive success of an Arctic  
120 herbivore through trophic mismatch. *Philos. Trans. R. Soc. London B* 363: 2367-2373.
- 121 11. McKinney AM, et al. (2012) Asynchronous changes in phenology of migrating Broad-tailed  
122 Hummingbirds and their early-season nectar resources. *Ecology* 93:1987-1993.
- 123 12. Mayor SJ, et al. (2017) Increasing phenological asynchrony between spring green-up and  
124 arrival of migratory birds. *Sci Rep-UK* 7.
- 125 13. Ross MV, Alisauskas RT, Douglas DC, Kellett DK (2017) Decadal declines in avian  
126 herbivore reproduction: density-dependent nutrition and phenological mismatch in the  
127 arctic. *Ecology* 98:1869-1883.
- 128 14. Ovaskainen O, et al. (2013) Community-level phenological response to climate change. *Proc.*  
129 *Natl. Acad. Sci. USA* 110:13434-13439.
- 130 15. Aebischer NJ, Coulson JC, Colebrookl JM (1990) Parallel long-term trends across four  
131 marine trophic levels and weather. *Nature* 347:753-755.
- 132 16. Seebens H, Einsle U, Straile D (2009) Copepod life cycle adaptations and success in response  
133 to phytoplankton spring bloom phenology. *Glob Change Biol* 15:1394–1404.
- 134 17. Bartomeus I, et al. (2011) Climate-associated phenological advances in bee pollinators and  
135 bee-pollinated plants. *Proc Natl Acad Sci USA* 108:20645–20649.
- 136 18. Rafferty NE, Ives AR (2011) Effects of experimental shifts in flowering phenology on plant–  
137 pollinator interactions. *Ecol Lett* 14:69-74.
- 138 19. Johansson J, Kristensen NP, Nilsson JÅ, Jonzén N (2015) The eco-evolutionary  
139 consequences of interspecific phenological asynchrony—a theoretical  
140 perspective. *Oikos* 124:102-112.

- 141  
142  
143  
144  
145  
146  
147  
148  
149  
150  
151  
152  
153  
154  
155  
156  
157  
158  
159  
160  
161  
162  
163  
164  
165  
166  
167  
168  
169  
170  
171  
172  
173  
174  
175  
176  
177  
178
20. Iler AM, et al. (2013) Maintenance of temporal synchrony between syrphid flies and floral resources despite differential phenological responses to climate. *Glob. Change Biol.* 19:2348-2359.
  21. Gustine D, et al. (2017) Advancing the match-mismatch framework for large herbivores in the Arctic: Evaluating the evidence for a trophic mismatch in caribou. *PLOS ONE* 12:e0171807.
  22. Visser ME, Van Noordwijk AJ, Tinbergen JM, Lessells CM (1998) Warmer springs lead to mistimed reproduction in great tits (*Parus major*). *Philos. Trans. R. Soc. London B* 265:1867-1870.
  23. Bauer Z, et al. (2010) Changing climate and the phenological response of great tit and collared flycatcher populations in floodplain forest ecosystems in Central Europe. *Int. J. Biometeorol.* 54:99-111.
  24. Charmantier A, et al. (2008) Adaptive Phenotypic Plasticity in Response to Climate Change in a Wild Bird Population. *Science* 320:800-803.
  25. Hua F, et al. (2016) Community-wide changes in intertaxonomic temporal co-occurrence resulting from phenological shifts. *Glob Change Biol* 22:1746-1754.
  26. Mortensen LO, et al. (2016) Analysis of trophic interactions reveals highly plastic response to climate change in a tri-trophic high-Arctic ecosystem. *Polar Biol* 39:1467-1478.
  27. Bolmgren K, Eriksson O (2015). Are mismatches the norm? Timing of flowering, fruiting, dispersal and germination and their fitness effects in *Frangula alnus* (Rhamnaceae). *Oikos* 124:639-648.
  28. Bewick S, Cantrell RS, Cosner C, Fagan WF (2016) How resource phenology affects consumer population dynamics. *Am. Nat* 187:151-166.
  29. Forrest JR, Thomson JD (2011). An examination of synchrony between insect emergence and flowering in Rocky Mountain meadows. *Ecol Monogr* 81:469-491.
  30. van Asch M, Visser ME (2007) Phenology of forest caterpillars and their host trees: the importance of synchrony. *Annu Rev Entomol* 52:37-55.
  31. Johansson J, Jonzén N (2012) Game theory sheds new light on ecological responses to current climate change when phenology is historically mismatched. *Ecol Lett* 15:881-888.
  32. Nussey DH, Postma E, Gienapp P, Visser ME (2005) Selection on heritable phenotypic plasticity in a wild bird population. *Science* 310:304-306.
  33. Danforth BN (1999) Emergence dynamics and bet hedging in a desert bee, *Perdita portalis*. *Philos. Trans. R. Soc. London B* 266:1985-1994.
  34. Singer MC, Parmesan C (2010) Phenological asynchrony between herbivorous insects and their hosts: signal of climate change or pre-existing adaptive strategy? *Philos. Trans. R. Soc. London B* 365:3161-3176.
  35. Hegland SJ, Nielsen A, Lázaro A, Bjerknes AL, Totland Ø (2009) How does climate warming affect plant-pollinator interactions? *Ecol Lett* 12:184-195.

## 179 **Appendix S.2. Additional information for methods**

### 180 A. DATA

#### 181 a) Phenological data

182 *i) Database construction.* We searched Web of Science using the search string: phenolog\* AND  
183 mismatch\* OR synchron\* AND interact\*, and then further refined by ‘ecology’ to identify  
184 studies in peer-reviewed journals that recorded phenology for interacting species prior to August  
185 2015, netting 188 studies. To be selected, phenological data had to be associated with a  
186 treatment, site or year. In addition, authors had to be explicit that the two species interacted (e.g.  
187 specifying type of interaction). However, the author’s definition of ‘interacting species’ and the  
188 degree to which two species interacted (i.e. interaction strength) likely varied across studies.  
189 Studies that considered assemblies of species (e.g. communities) or comparisons across  
190 taxonomic groups were not included (n=9). Given that only rarely was enough detail provided to  
191 be able to quantify the strength of the interaction (10/54 interactions), we were unable to use a  
192 quantitative approach to define the strength of interaction (and thus unable to assess whether  
193 synchrony change varies with strength of interaction). Only one of the interactions was explicitly  
194 described as specialized. All of the other interactions were ‘diffuse’ in some way: many  
195 interactions consisted of data for a consumer and a group of resources (e.g. genus) or data for a  
196 single consumer and resource but either the consumer or resource was paired across multiple  
197 interactions. To ensure a reasonable sample size and to include studies across different major  
198 biomes, we included interactions that were resolved to the genus-level and below. Given that the  
199 majority of taxa in this study were species (n=61; 69%), we use the term ‘species’ throughout the  
200 paper to represent both species and genus.

201 We excluded time-series that (1) were shorter than 5 years in length; (2) did not measure  
202 phenology as day of year (e.g. proportion of individuals observed by a particular date); or (3) did  
203 not measure phenology directly (e.g. used derived measures of phenology, such as NDVI).  
204 Although none of the authors mentioned it explicitly, we assumed that authors corrected for leap  
205 years because the majority of the studies represented original empirical collections. We do note  
206 that not correcting for leap years could introduce bias into estimates of phenological shifts (1).

207 To avoid using the same data set more than once, we further reduced the database. In  
208 cases where two studies had tracked the same interaction in the same location for completely  
209 overlapping years (n=2), we randomly chose one study. When the studies only partially  
210 overlapped in time (n=2) or when the same interaction was considered by multiple studies (i.e.  
211 non-unique interactions; n=2), we chose the study with the longer time series.

212 When multiple phenological events per species were recorded in a given study, we  
213 prioritized maximizing the number of years with data for both species and when possible we  
214 chose first date because it was the most common metric across studies. When multiple sites were  
215 included in a given study (n=4 studies), we took the median day of year across sites.

216 In total, we were able to identify 54 unique pair-wise species interactions among 27  
217 studies (Table S8) with time-series phenological data that spanned 1951 to 2013. Our dataset  
218 includes 88 species that span a wide range of taxonomic groups from aquatic and terrestrial  
219 ecosystems across four continents (Figure S1). The mean study length was 21.7 years (sd=8.4)  
220 and mean first year of study was 1984 (sd=9.4).

#### 221 222 *ii) Data structure*

223 Our final database included some species that were replicated across time and/or space.  
224 These cases differed from the interactions described above because aspects of these interactions

225 were unique (other species, location or time-series). There were repeating species that occurred  
226 both within (i.e. where a single species was in multiple interactions) and across studies. For those  
227 species found in more than one study, the time-series length (e.g. *Parus major*: 1985-2005 (2) vs.  
228 1961-2006 (3)) and/or location (e.g. *Parus major*: Netherlands (2) vs. Wytham, UK (3)) would  
229 vary between studies. Repeating species were included as independent data points (but see  
230 statistical analysis section for decisions related to pseudoreplication); i.e. each unique species-  
231 location-time series combination was included. However, the number of repeating species  
232 constituted a small proportion of the overall number of species (within studies: 15/88; across  
233 studies: 8/88; Table S8).

234

## 235 b) Temperature data

### 236 *i) Database construction*

237 For those studies that considered temperature as a main phenological cue for at least one  
238 of the interacting species, we included temperature data for those years with phenological data  
239 for both species. We excluded studies i) that measured temperature as a function of the day of  
240 year (e.g. when a certain temperature was reached) to isolate the effect of temperature from time;  
241 ii) found temperature was not a predictor of phenology for either taxon (n=2); iii) measured  
242 temperature as a cumulative sum across days; iv) where nutrients have been shown to explain  
243 phenology of one of the interacting species (n=3).

244 Since our goal was to link temperature change to synchrony change, temperature change  
245 was estimated for an interaction (rather than a species). Therefore, decisions about which  
246 temperature variable to use were made at the interaction level. For example, if one species had  
247 first day of ice break as the best predictor and March temperature was the best predictor for the  
248 other species, change in March temperature was estimated. If temperature was not mentioned as  
249 a predictor for a species in an interaction, temperature data for the other species was used for  
250 both species in the interaction. For more details on which temperature metrics were used, see  
251 Table S1. The mean number of years with temperature data available and with phenological data  
252 for both partners of the interaction was 20.65 (8.56SD) years.

253

### 254 *ii) Data structure*

255 After construction of our temperature database we identified two types of non-  
256 independence (see discussion about the issue in the analysis section). First, there were several  
257 studies with temperature data that came from the same weather station location (Air: 2 studies;  
258 Water: 2 studies; Table S2). However, different temperature metrics were used for the species at  
259 these locations. Second, there were three studies with temperature data from multiple sites (2-3  
260 sites/study; Table S3). For these studies, we took the mean temperature across sites. In the end,  
261 there were 18 unique datasets (i.e. independent measure of temperature) from 13 studies.

262

## 263 B. STATISTICAL ANALYSIS

264 *(Note that these descriptions of our statistical methods supplement those in the main text so both*  
265 *sections should be read together)*

### 266 *i) Overall approach*

267 The analysis was divided into four sections. First, we estimated phenological shift  
268 (days/decade) across species. Next, we estimated synchrony change (days/decade) using those  
269 estimates of phenological shift. Third, we estimated temperature change (°C/decade) and

270 phenological sensitivity to temperature (days/°C) across species. Finally, we examined whether  
271 temperature change could predict phenological and synchrony change.

272 All statistical analyses were conducted in the R 3.3.2 environment (4) using the *rstan*  
273 package (version 2.14.1). Stan provides efficient MCMC sampling via a No-U-Turn Hamiltonian  
274 Monte Carlo approach (5,6). Posterior distributions of model parameters were estimated from  
275 3000 samples from each of four independent Markov chains. The number of iterations varied by  
276 model (range=6000-14000) but convergence was always achieved. Convergence of the four  
277 chains and sufficient sampling of posterior distributions were confirmed by: visual inspection of  
278 parameter traces, ensuring a scale reduction factor ( $\hat{R}$ ) below 1.01, and an effective size ( $n_{\text{eff}}$ ) of  
279 at least 10% the number of iterations (6).

280 We used three approaches to test our models. First, to ensure models were specified  
281 properly we checked that our models could return known parameters generated from simulated  
282 data. Second, we assessed overall model fit using posterior predictive checks (estimated global  
283 parameters from the hierarchical models were compared against parameters estimated from  
284 simple linear models). Finally, we validated our estimates of synchrony change with the  
285 estimates from a sample of original studies (see Appendix S3).

286 Given significant warming trends in recent decades and the detection of non-stationarities  
287 in both temperature data and recent ecological responses to climate change (7-12), we used a  
288 hinge model (Figure S2). There is no consensus on a breakpoint for temperature change: the  
289 estimates vary for different places and are dependent on data and methods (13-15). Breakpoints  
290 range from 1976 to 1984 with much of the change noted in the early 1980s. We used 1981 as the  
291 inflection point to reflect the major change in temperature observed in the early 1980s. To test  
292 the robustness of our estimates of synchrony change (the key analysis of the paper), we also used  
293 an inflection point of 1976 and the results were similar (Appendix S3).

294 We used a two-level hierarchical model for all analyses. We were unable to include study  
295 as a hierarchical level because we did not have a reasonable number of repeating species across  
296 studies (i.e. the species that did repeat across studies only did so across a small number of studies  
297 (2-3)). Therefore the model would not have been able to properly partition variance between  
298 species and studies. Additionally, we did not have very strong prior to inform the model where to  
299 partition the variance.

300 To account for potential study differences (e.g. methodology), we took two approaches.  
301 First, by pooling slopes or intercepts across species, the models weighted species based on the  
302 variance and length of time-series, thus accounting for this major methodological difference  
303 across studies. Secondly, we directly evaluated the strength of the relationship between  
304 synchrony change and three main factors that differed across studies: frequency of phenological  
305 observation (daily or weekly), first year of study, and length of study (see Appendix S3 for  
306 analysis).

307

308

### 309 *ii) Covariate models*

310 To estimate the relationship between temperature change and synchrony change, we fit  
311 synchrony change as a function of temperature change. To do so, we took the same steps as the  
312 covariate model for phenology but with one modification. In order to obtain one estimate of  
313 temperature change for interactions where different temperature metrics were provided for each  
314 species in an interaction ( $n=8$ ), we used the temperature data for the resource. We tested the  
315 robustness of our results by choosing the consumer in the relationship and the results were



316 similar ( $\beta = 0.2$  days/ $^{\circ}\text{C}$  (-0.2, 0.5)). The slope of the relationship slightly differed ( $\beta = 0.2$  (-0.2,  
317 0.5) vs.  $\beta = -0.1$  (-0.5, 0.2)) because temperature change was estimated on a different number of  
318 species (resource: 21 vs. consumer=18): there were some consumers common to multiple  
319 interactions.

320

## 321 b) Null models

322 We constructed three different null models. Two were used to establish a baseline for  
323 changes in synchrony by estimating the amount of natural variation among interactions before  
324 recent climate change began and one was used to explore the effect of time series length on  
325 estimates of phenological change.

326

327 *i) Synchrony null model- modeled estimates of synchrony change from simulated data using pre-*  
328 *recent climate change data:*

329 Our workflow to simulate synchrony change based on phenological change estimated  
330 before significant climate change was as follows:

- 331 1. We estimated phenological change on the ‘pre-recent climate change’ datasets  
332 following methods described in the main text.
- 333 2. We calculated *observed* synchrony change for this subset of interactions (n=22) using  
334 our estimates obtained in step 1 and following methods described in the main text.
- 335 3. Next we simulated data for each pair of interacting species:
  - 336 a. For the first species in each pair (sppA), we sampled the posterior  
337 distributions for slope and intercept (obtained in step 1) to predict the date for  
338 a given year (ypred). To determine the years and length of time series, we  
339 randomly chose a pre-recent climate change dataset. We then sampled new  
340 dates from a normal distribution of the required length. This distribution was  
341 constructed using the mean of ypred and a randomly sampled estimate of  
342 variation from the posterior distribution of the pre-recent climate change  
343 datasets.
  - 344 b. For the second species in each pair (sppB), we sampled an estimate of  
345 synchrony change from the observed distribution (step 2) and used the  
346 difference between slope for sppA (step 3a) and synchrony change to  
347 calculate the slope for sppB. To predict dates for sppB, we sampled an  
348 intercept and estimate of variation from sppA (step 1). We used the same  
349 years and length of time series as sppA. We followed the same approach as  
350 step3a to simulate new dates for sppB.
- 351 4. We then estimated phenological change across all years on this simulated data for all  
352 species following methods described in the main text.
- 353 5. Finally, we calculated *simulated* synchrony change for all interactions following  
354 methods described in the main text.
- 355 6. Steps 3-5 were repeated five times.
- 356 7. One null model was then randomly chosen and results from this model were reported.

357

358 This approach is likely to capture any phenological change that actually occurred from  
359 1951-1981, though our estimates of synchrony change are simulated based on estimates of  
360 phenological change and not raw data. To explore another null model option, we also simulated  
361 synchrony change directly from the raw data from the pre-recent climate change data. This

362 model predicted smaller synchrony change but also likely underestimates potential phenological  
363 change from 1951-1981.

364 *ii) Synchrony null model- estimates of synchrony change from raw pre-recent climate change*  
365 *data*

366 We estimated synchrony change for 1951-1981 using the ‘pre-recent climate change ‘datasets  
367 (n=16 interactions). To estimate changes in phenology, we used a non-hinge model as described  
368 in the main text. Then to estimate the change in synchrony, we followed the steps we outlined in  
369 the main text for the synchrony models.

370

371 *iii) Time series length null model*

372 To explore the effect of time series length on estimates of phenological change without  
373 significant climate change occurring:

- 374 1. We estimated phenological change on the pre-recent climate change datasets  
375 following methods described in the main text.
- 376 2. We then simulated data for all species based on X=5 to 40 (by 5 year increments)  
377 years of data.
- 378 3. For each species, we followed the same approach as used to estimate phenological  
379 change for sppA as described above (Appendix S2.B.b.i.3.a). Briefly, we sampled the  
380 posterior distributions for slope and intercept created in step 1 (Appendix S2.B.b.iii.1)  
381 to predict the date in a given year (ypred). To determine the years of the time series,  
382 we randomly chose X number of years from the full dataset (1951-2013).
- 383 4. We estimated phenological change on this simulated data for all species following  
384 methods described in the main text for each time series increment.

385

## 386 C. REFERENCES ASSOCIATED WITH METHODS

- 387 1. Sagarin R (2001) Phenology: False estimates of the advance of spring. *Nature* 414:600-  
388 600.
- 389 2. Both C, Van Asch M, Bijlsma RG, Van Den Burg AB, Visser ME (2009) Climate change  
390 and unequal phenological changes across four trophic levels: constraints or adaptations? *J*  
391 *Anim. Ecol.* 78:73-83.
- 392 3. Charmantier, A. *et al.* Adaptive Phenotypic Plasticity in Response to Climate Change in a  
393 Wild Bird Population. *Science.* **320**, 800-803 (2008).
- 394 4. R Development Core Team. R: A Language and Environment for Statistical Computing.  
395 R Foundation for Statistical Computing, Vienna, Austria, (2016).
- 396 5. Gelman, A. *et al.* Bayesian Data Analysis. 3rd ed. CRC Press, New York. (2014)
- 397 6. Gelman, A. & Hill, J. Data analysis using regression and multilevel/hierarchical models.  
398 Cambridge University Press, UK. (2007)
- 399 7. Booth, B.B., Dunstone, N.J., Halloran, P.R., Andrews, T. & Bellouin, N. Aerosols  
400 implicated as a prime driver of twentieth-century North Atlantic climate variability.  
401 *Nature* **484**, 228-232 (2012).
- 402 8. Wolkovich, E.M., Cook, B.I., McLauchlan, K.K. & Davies, T.J. Temporal ecology in the  
403 Anthropocene. *Ecol. Lett.* **17**, 1365-1379 (2014).
- 404 9. Cook, B.I. & Wolkovich, E.M. Climate change decouples drought from early wine grape  
405 harvests in France. *Nature Climate Change* **6**, 715-719 (2016).
- 406 10. Navarro, J.A., *et al.* Amplification of Arctic warming by past air pollution reductions in  
407 Europe. *Nature Geoscience* **9**, 277-281 (2016).

- 408  
409  
410  
411  
412  
413  
414  
415  
416  
417
11. Medhaug, I., Stolpe, M.B., Fischer, E.M. & Knutti, R. Reconciling controversies about the 'global warming hiatus'. *Nature* **545**, 41-47 (2017).
  12. Risbey, J.S. & Lewandowsky, S. Climate science: The 'pause' unpacked. *Nature* **545**, 37-39 (2017).
  13. Seidel, D. J. & J. R. Lanzante. An assessment of three alternatives to linear trends for characterizing global atmospheric temperature changes. *J. Geophys. Res.* **109**, D14108 (2004).
  14. Solomon, S. et al. *Climate Change 2007: The physical Science Basis* (IPCC, 2007).
  15. Cahill, N., Rahmstorf, S. & Parnell, A.C. Change points of global temperature. *Environmental Research Letters* **10**, p.084002 (2015).

418 Figure S1. Map of all studies (n=27) included in the analysis.

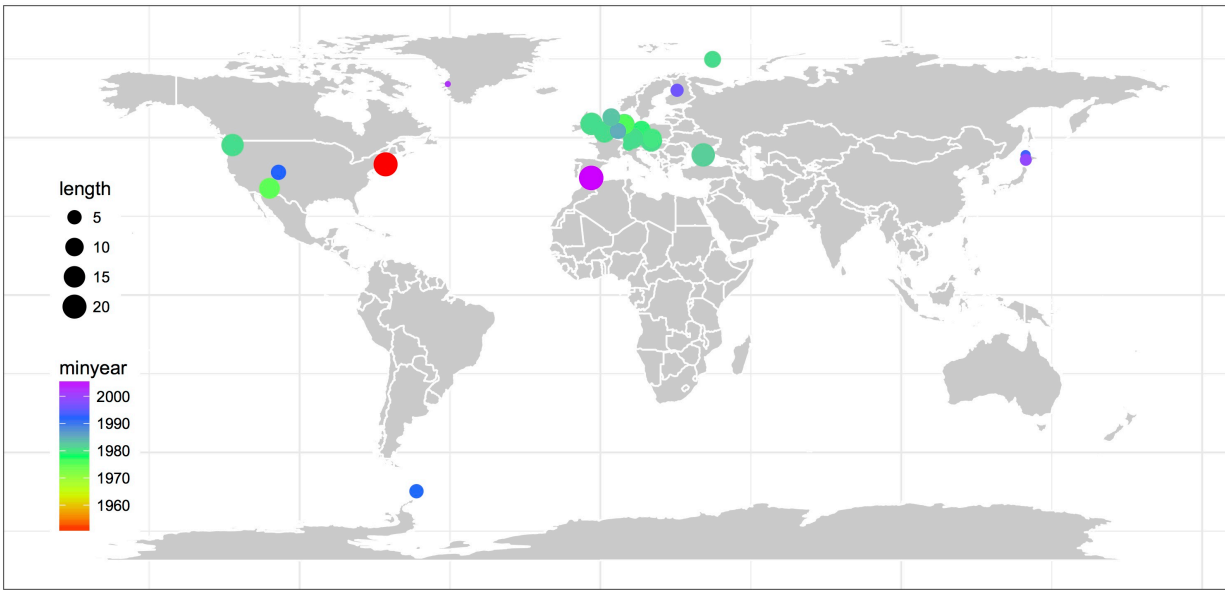

419

420 Figure S2. Estimating phenological change (days/year) using a hinge model and linear model for  
421 two interactions. (a) *Daphnia spp.* (in red) and *Perca fluviatilis* (in green) over the years 1969 to  
422 2008 and (b) *Operophtera brumata* (in red) and *Parus major* (in green) over the years 1961 to  
423 2008. Solid lines represent hinge model and dashed lines represent linear model. The dotted  
424 vertical line represents the inflection point of 1981 at year 0.

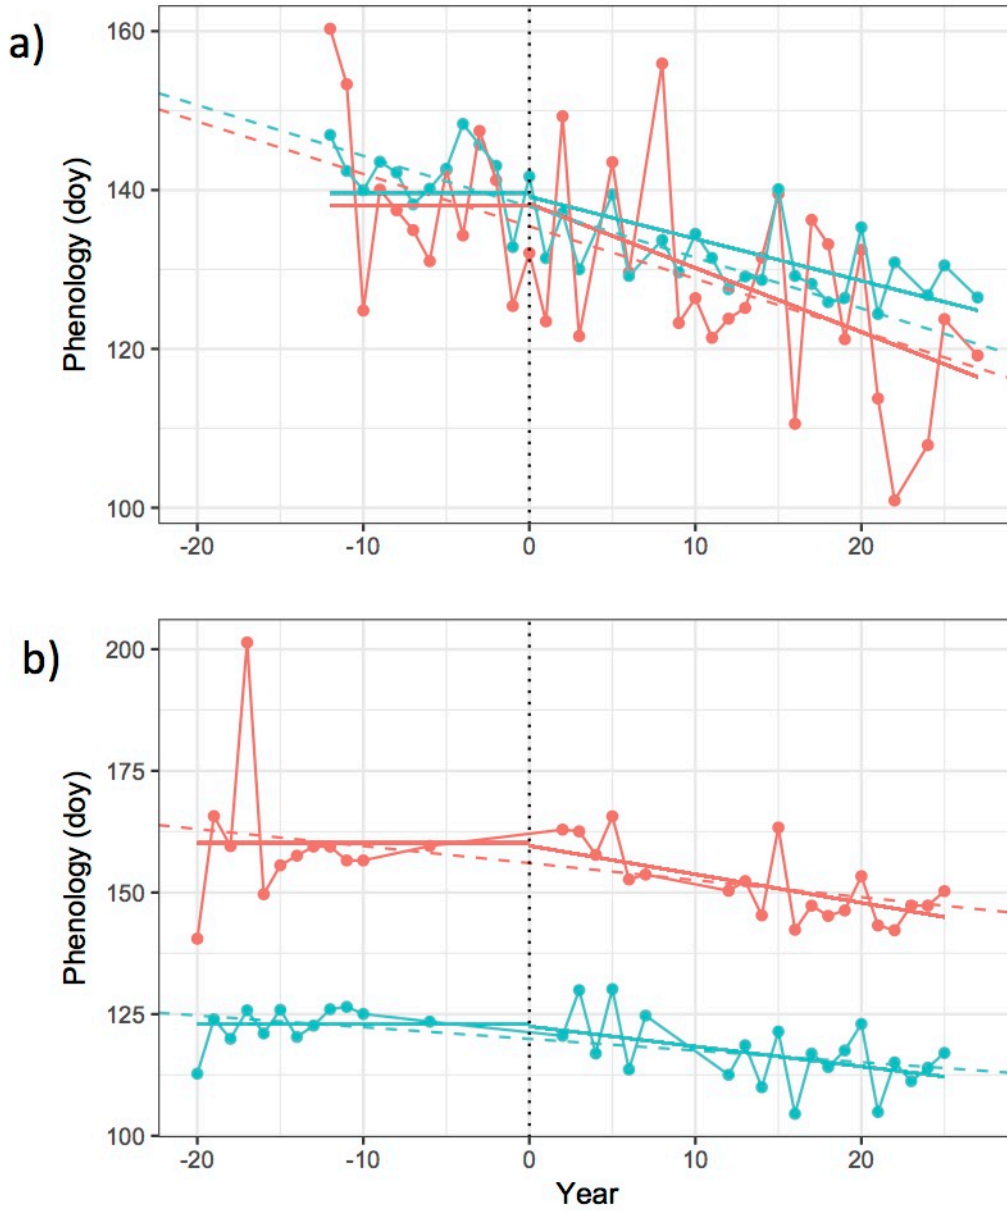

425

426 Figure S3. Phenological sensitivity to temperature (a) and temperature change across datasets  
427 (b). Raw data are shown as points in (a) and as time-series in (b). Colours represent different  
428 species in (a) and unique time-series in (b). Coloured lines in (a) represent estimates of  
429 temperature sensitivity for each species with the global slope in black ( $-4.78 \text{ days}/^\circ\text{C}$ ) and 95%  
430 credible intervals in grey. For (b), the solid line represents the global slope ( $0.077 \text{ days}/\text{year}$ )  
431 with 95% credible intervals in grey and the dotted vertical line represents the inflection point of  
432 1981 at year 0.

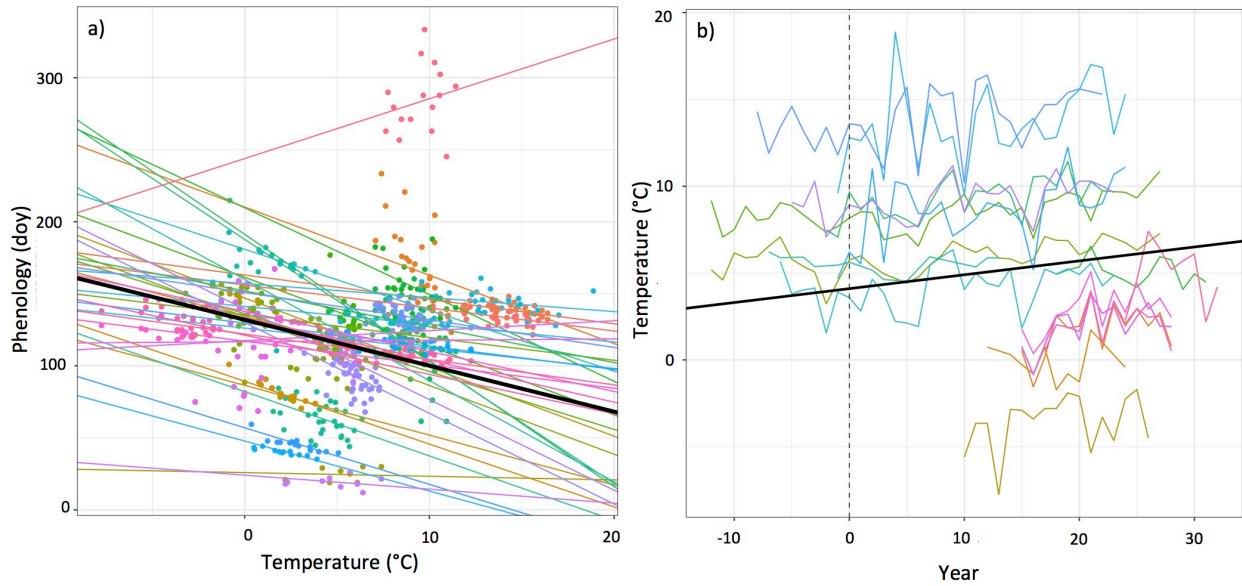

433  
434  
435

436 Table S1. List of species interactions for which temperature change and sensitivity were estimated (n=13 studies; 37 species).  
 437 Bibliographic information for studies is in Appendix S3.

| Type of temperature | Study reference | First species                    | Second species                 | Ecosystem type | Temperature metric                   |
|---------------------|-----------------|----------------------------------|--------------------------------|----------------|--------------------------------------|
| air                 | 24              | <i>Engraulis japonicus</i>       | <i>Cerorhinca monocerata</i>   | Aquatic        | Mean temperature in March            |
| water               | 21              | <i>Phytoplankton spp.</i>        | <i>Daphnia spp.</i>            | Aquatic        | Monthly mean for April-May           |
|                     |                 | <i>Daphnia spp.</i>              | <i>Perca fluviatillis</i>      | Aquatic        | Monthly mean for April-May           |
| water               | 19              | <i>Phytoplankton spp.</i>        | <i>Cyclops vicinus</i>         | Aquatic        | April temperature (measured monthly) |
| water               | 25              | <i>Diatom spp.</i>               | <i>Copepod spp.</i>            | Aquatic        | Monthly mean for January to March    |
| water               | 18              | <i>Copepod spp.</i>              | <i>Pleurobrachia pileus</i>    | Aquatic        | Monthly mean for April-June          |
|                     |                 | <i>Pleurobrachia pileus</i>      | <i>Beroe gracilis</i>          | Aquatic        | Monthly mean for April-June          |
| air                 | 22              | <i>Epirrita autumnata</i>        | <i>Poecile montanus</i>        | terrestrial    | Monthly mean for March-May           |
| air                 | 15              | <i>Pygoscelis adeliae</i>        | <i>Pygoscelis antarcticus</i>  | terrestrial    | Mean temperature in October          |
|                     |                 | <i>Pygoscelis adeliae</i>        | <i>Pygoscelis papua</i>        | terrestrial    | Mean temperature in October          |
|                     |                 | <i>Pygoscelis antarcticus</i>    | <i>Pygoscelis papua</i>        | terrestrial    | Mean temperature in October          |
| air                 | 14              | <i>Bombus spp.</i>               | <i>Corydalis ambigua</i>       | terrestrial    | Mean temperature in April            |
| air                 | 1               | <i>Ficedula albicollis</i>       | <i>Glis glis</i>               | terrestrial    | Mean temperature in May              |
|                     |                 | <i>Parus caeruleus</i>           | <i>Glis glis</i>               | terrestrial    | Mean temperature in May              |
|                     |                 | <i>Parus major</i>               | <i>Glis glis</i>               | terrestrial    | Mean temperature in May              |
|                     |                 | <i>Sitta europaea</i>            | <i>Glis glis</i>               | terrestrial    | Mean temperature in May              |
| air                 | 17              | <i>Acrocephalus arundinaceus</i> | <i>Acrocephalus scirpaceus</i> | terrestrial    | Mean temperature in May              |
| water               | 2               | <i>Diatom spp.</i>               | <i>Daphnia spp.</i>            | aquatic        | Monthly mean for March-May           |

|     |    |                         |                                  |             |                              |
|-----|----|-------------------------|----------------------------------|-------------|------------------------------|
|     |    | <i>Diatom spp.</i>      | <i>Thermocyclops oithonoides</i> |             | Monthly mean for March-May   |
| air | 23 | <i>Caterpillar spp.</i> | <i>Parus major</i>               | terrestrial | Monthly mean for March- May  |
|     |    | <i>Caterpillar spp.</i> | <i>Parus caeruleus</i>           | terrestrial | Monthly mean for March- May  |
| air | 3  | <i>Pica pica</i>        | <i>Clamator glandarius</i>       | terrestrial | Mean temperature in February |



438 Table S2. List of studies with temperature data that came from the same weather station location.  
439 Bibliographic information for studies is in Appendix S3.

| Environment | Site                       | Study reference |
|-------------|----------------------------|-----------------|
| Air         | Oulu, Finland              | 22              |
|             |                            | 23              |
| Water       | Helgoland Roads, North Sea | 25              |
|             |                            | 18              |

440

441

442 Table S3. List of studies with temperature data across multiple sites. Bibliographic information  
443 for studies is in Appendix S4.

| Study reference | Number of sites |
|-----------------|-----------------|
| 15              | 2               |
| 21              | 2               |
| 14              | 3               |

444

445

446 **Appendix S3. Additional analyses**

447 Proof of concept: Comparisons of our approach with original studies

448 To show that our approach was able to recapture estimates of phenological shift and general  
449 changes in synchrony, we included a brief comparison of our findings and the results from the  
450 original studies (Table S4 and Table S5).

451

452 Insensitivity of results to alternative inflection points

453 To test the robustness of our synchrony change results, we also used an inflection point of  
454 1976 in our hinge model. As described in more detail in the main text, to estimate changes in  
455 synchrony over time, we used a two-level hierarchical hinge model for those species with greater  
456 than 4 years of data before 1976. Synchrony was estimated as described in the main text.

457 Results were near identical with 1976 as our inflection point (vs. 1981). Overall  
458 synchrony change was 0.51 days/decade (95% CI: -2.2, 1.1, n=54) and the magnitude of change  
459 6.06 days/decade (95%CI: 5.2, 6.9, n=54).

460

461 Influence of methodological differences of studies on results

462 To evaluate the influence of key methodological differences across studies, we estimated  
463 the relationship between synchrony change and each of: first year of study, length of time series  
464 and frequency of phenological observation (daily, weekly), using linear models (n=54).

465 Additionally, we evaluated the effect of time series length and first year of study on the  
466 magnitude of synchrony change and temperature, as well as the influence of two early and short  
467 studies from the 1950s on our estimate of the magnitude of synchrony change. Since there is a  
468 strong negative relationship between time series length and first year of study across the dataset  
469 ( $r=-0.55$ ,  $r=-0.86$  if you exclude the time series from the 1950s), we consider the influence of  
470 these factors individually.

471 Overall, we did not find any strong or consistent relationships between time series length,  
472 first year of study and our key response variables. While we did find a negative relationship  
473 between first year of study and the magnitude of synchrony change, this relationship was entirely  
474 driven by the two early studies from the 1950s (Figure S4, Table S6). Without the outliers,  
475 synchrony has shifted in magnitude by 5.9 days/decade (95%CI: 5.1, 6.8). Since the estimate of  
476 synchrony change is near identical with (6.1 days/decade; 95% CI: 5.2,7.0) and without those  
477 two outliers, the results in the main text are based on the full dataset. Finally, synchrony change  
478 was not influenced by the estimated effect of frequency of observation (overall synchrony  
479 change: -0.33 days/6-day change in frequency, 95% CI: -0.7,0.01; magnitude of synchrony  
480 change: 0.06 days/6-day change in frequency, 95% CI: -0.2, 0.3).

481 To evaluate the potential influence of latitudinal patterns in time series length and the  
482 first year of study, we evaluated latitudinal variation in synchrony change, first year of study and  
483 length of time series. We found that studies conducted at higher latitudes started more recently  
484 (Figure S4, Table S7). However, we did not find any latitudinal pattern in synchrony change  
485 (Table S7).

486

487 Influence of changes in population size on results

488 Given that phenology was typically measured as the first date of occurrence in our  
489 database, we measured the sensitivity of our results to sampling frequency (see previous sub-

490 section for more details) and potential changes in population size on our estimates of synchrony  
491 change (described here).

492 To evaluate the potential changes in population size on our estimates of synchrony  
493 change, we excluded studies that (1) explicitly mentioned they detected directional changes in  
494 population estimates (i.e., abundance or density) over time and (2) had used first dates of  
495 occurrences. Four studies consisting of 7 pair-wise interactions in total met these criteria. In  
496 these studies, species experienced either positive or negative changes in population size over  
497 time. Temporal increases in population size can lead to spurious trends towards earlier dates  
498 whereas temporal decreases in population size can lead to biases towards later dates (1)<sup>1</sup>.

499 We found no evidence that such shifts, however, influenced our results. With these  
500 interactions excluded, the estimates of synchrony change were similar to the estimates presented  
501 in the main text. The magnitude of synchrony change was 6.0 days/decade (95%CI: 5.1 to 7.0)  
502 and the overall estimate of synchrony change (including both direction and magnitude) was 0.56  
503 days/decade (95%CI: -2.3 to 1.2). Similar to the results presented in the main text, there was  
504 variation across interactions in the direction of shifts in synchrony: 55% (26/47) of the  
505 interacting species are shifting closer together, whereas 45% (21/47) of the interacting species  
506 are shifting further apart. Therefore, we believe that the use of first dates of occurrences in some  
507 of our studies did not impact our main conclusions.

---

<sup>1</sup> Miller-Rushing AJ, Høye TT, Inouye DW, Post E (2010) The effects of phenological mismatches on demography. *Philos. Trans. R. Soc. London B* 365:3177-3186.

508 Figure S4. Relationship between (a) the magnitude of synchrony change and first year of study  
509 ( $\beta=-0.15$  days/decade per year (0.06SE)) and (b) first year of study and latitude ( $\beta=0.41$   
510 year/degree of latitude (0.15SE)). Shown is the predicted slope with a 95% confidence interval.

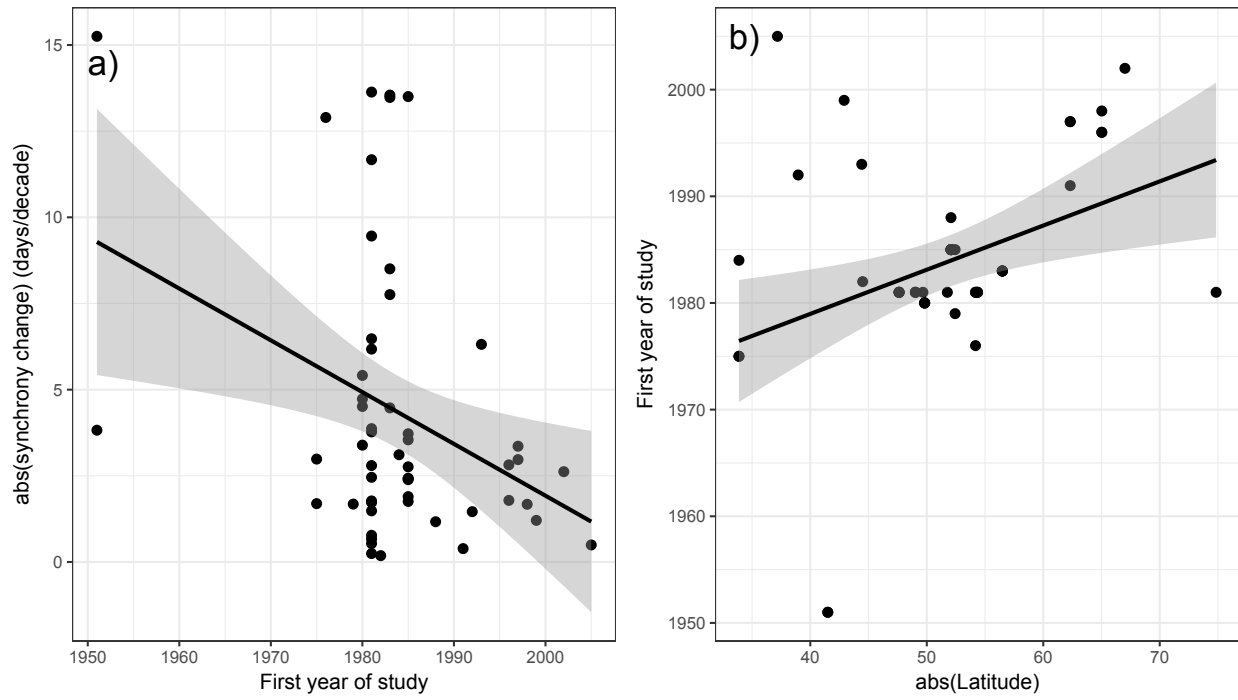

512 Table S4. A comparison of some phenological shift estimates between our paper and original  
 513 studies. The Bayesian model we used adjusts estimates based on time-series length and variance  
 514 of original data. All estimates are days per decade. Bibliographic information for studies is in  
 515 Appendix S4.

| Study reference (location) | Species              | Time series | Standard deviation of phenological event dates | Stan estimate (95% credible interval) | Linear model estimate (SE) | Original study |
|----------------------------|----------------------|-------------|------------------------------------------------|---------------------------------------|----------------------------|----------------|
| 5 (Netherlands)            | <i>Parus major</i> * | 1985-2005   | 4.41                                           | -3.8 (-10.8, 3.2)                     | -3.7 (1.4)                 | -3.6           |
|                            | <i>Parus major</i> § | 1985-2004   | 4.37                                           | -3.4 (-10.7, 3.7)                     | -3.1 (1.6)                 | -3.6           |
| 7 (UK)                     | <i>Parus major</i>   | 1961-2007   | 6.57                                           | -4.3 (-8.5, -0.2)                     | -4.4 (1.0)                 | -3.0           |
| 4 (Czech Republic)         | <i>Parus major</i>   | 1961-2007   | 6.28                                           | -3.1 (-7.7, 1.5)                      | -2.9 (1.3)                 | -1.7           |

516 \* Interaction between *Parus major* and caterpillar

517 § Interaction between *Parus major* and *Accipiter nisus*

518

519

520 Table S5. A comparison of some synchrony change estimates between our paper and original  
 521 studies. We chose studies that included a concluding statement about synchrony changes and  
 522 paraphrased the wording. We note that direct comparisons of magnitude of synchrony change  
 523 between our estimates and the original estimates are challenging because studies took different  
 524 approaches in calculating synchrony changes. Moreover, we specifically did not evaluate  
 525 whether synchrony changes for individual interactions were significant. Bibliographic  
 526 information for studies is in Appendix S4.  
 527

| Study reference | Interaction                     | Study conclusions                                       | Our estimate of synchrony change (95%CI)           |
|-----------------|---------------------------------|---------------------------------------------------------|----------------------------------------------------|
| 5               | <i>Parus major</i> -caterpillar | Interval between events got closer by 3.8 days/decade   | Events are closer by 2.4 days/decade (2.2, 2.6)    |
| 7               | <i>Parus major</i> -caterpillar | No change in synchrony (p>0.05)                         | Events are closer by 1.8 days/year (1.7, 1.9)      |
| 4               | <i>Parus major</i> -caterpillar | No change is synchrony (p>0.05)                         | Events are closer by 0.81 days/decade (0.68, 0.93) |
| 23              | <i>Parus major</i> -caterpillar | No change in synchrony*                                 | Events are closer by 2.0 days/decade (1.8, 2.3)    |
| 21              | <i>Daphnia</i> -phytoplankton   | Decrease in number of days between events (convergence) | Events are closer by 1.9 days/decade (1.8, 2.0)    |

528 \*Study compared overlap of events each year. For 8/16 years, there was a good match between  
 529 events. No formal statistics were provided.  
 530

531 Table S6. Relationship between synchrony and temperature change, and methodological  
 532 differences across studies. Synchrony and temperature change were estimated in days/year and  
 533 °C/year, respectively. Values in bold are slope estimates where the 95% credible interval does  
 534 not include zero.  
 535

| Response                        | Predictor                                       | Intercept (95%CI)   | Slope coefficient (95%CI)    | Sigma (95%CI)              |
|---------------------------------|-------------------------------------------------|---------------------|------------------------------|----------------------------|
| Synchrony change                | First year of study (n=54)                      | -0.1 (-0.3, 0.07)   | 0.02 (-1.3e-05, 0.03)        | 0.6 (0.5, 0.7)             |
|                                 | First year of study-without outliers (n=52)     | -0.05 (-0.3, 0.1)   | 0.01 (-0.02, 0.03)           | 0.6 (0.5, 0.7)             |
|                                 | Length of time series (n=54)                    | -0.2 (-0.6, 0.3)    | 0.004 (-0.02, 0.03)          | 0.62 (0.5, 0.8)            |
| Magnitude of synchrony change   | First year of study (n=54)                      | 0.5 (0.4, 0.6)      | <b>-0.01 (-0.03, -0.003)</b> | 0.4 (0.3, 0.5)             |
|                                 | First year of study-without two outliers (n=52) | 0.5 (0.4, 0.6)      | -0.01 (-0.03, 0.002)         | 0.4 (0.3, 0.5)             |
|                                 | Length of time series (n=54)                    | 0.4 (0.06, 0.7)     | 0.002 (-0.01, 0.02)          | 0.4 (0.35, 0.5)            |
| Magnitude of temperature change | First year of study (n=54)                      | 0.1 (-0.1, 0.4)     | -0.00001 (-1e-04, 9e-05)     | 0.003 (0.002, 0.004)       |
|                                 | Length of time series (n=54)                    | 0.08 (0.075, 0.081) | 3.2e-06 (-1.2e-04, 1.3e-04)  | 3.2e-03 (2.5e-03, 4.1e-03) |

536  
 537



538 Table S7. Relationship between first year of study, length of time series, synchrony change and  
 539 latitude of study. Synchrony change was estimated in days/year and the absolute value of latitude  
 540 was taken. Values in bold are slope estimates where the 95% credible interval does not include  
 541 zero.  
 542

| Response                                                | Predictor     | Intercept<br>(95%CI)    | Slope coefficient<br>(95%CI) | Sigma<br>(95%CI)     |
|---------------------------------------------------------|---------------|-------------------------|------------------------------|----------------------|
| First year of study<br>(n=54)                           | abs(latitude) | -18.7 (-34.4, -<br>3.8) | <b>0.42 (0.13, 0.72)</b>     | 9.04 (7.5,<br>11.03) |
| First year of study<br>- Without two<br>outliers (n=52) | abs(latitude) | -8.1 (-20.1, 3.8)       | <b>0.23 (0.002, 0.46)</b>    | 6.9 (5.7,<br>8.4)    |
| Length of time<br>series (n=54)                         | abs(latitude) | 25.39 (10.7,<br>40.0)   | -0.07 (-0.35, 0.21)          | 8.61 (7.15,<br>10.5) |
| Synchrony change<br>(n=54)                              | abs(latitude) | -0.39 (-1.5, 0.7)       | 0.01 (-0.01, 0.03)           | 0.62 (0.51,<br>0.75) |
| Magnitude of<br>synchrony change<br>(n=54)              | abs(latitude) | 0.35 (-0.38,<br>1.07)   | 0.002 (-0.01, 0.02)          | 0.42 (0.35,<br>0.52) |

543

544 **Appendix S4. Study and species information**

545 Table S8. Data-series characteristics for interacting species in the phenology and synchrony  
 546 change analyses. Bibliographic information for studies is in Appendix S4.

| Study reference | Consumer                         | Resource                        | Interaction type | Habitat     | First year of study | Number of years |
|-----------------|----------------------------------|---------------------------------|------------------|-------------|---------------------|-----------------|
| 8               | <i>Mnemiopsis leidyi</i>         | <i>Acartia tonsa</i>            | predation        | aquatic     | 1951                | 6               |
| 12              | <i>Tortrix viridana</i>          | <i>Quercus spp.</i>             | herbivory        | terrestrial | 1982                | 7               |
| 16              | <i>Selasphorus platycercus</i>   | <i>Castilleja tenuiflora</i>    | pollination      | terrestrial | 1984                | 19              |
|                 | <i>Selasphorus platycercus</i>   | <i>Delphinium nuttallianum</i>  | pollination      | terrestrial | 1975                | 30              |
|                 | <i>Selasphorus platycercus</i>   | <i>Erythronium grandiflorum</i> | pollination      | terrestrial | 1975                | 28              |
| 22              | <i>Poecile montanus</i>          | <i>Epirrita autumnata</i>       | herbivory        | terrestrial | 1996                | 14              |
| 24              | <i>Cerorhinca monocerata</i>     | <i>Engraulis japonicus</i>      | predation        | aquatic     | 1993                | 11              |
| 15              | <i>Pygoscelis antarcticus</i>    | <i>Pygoscelis adeliae</i>       | competition      | terrestrial | 1997                | 10              |
|                 | <i>Pygoscelis papua</i>          | <i>Pygoscelis adeliae</i>       | competition      | terrestrial | 1991                | 17              |
|                 | <i>Pygoscelis papua</i>          | <i>Pygoscelis antarcticus</i>   | competition      | terrestrial | 1997                | 10              |
| 21              | <i>Daphnia spp.</i>              | <i>Phytoplankton spp.</i>       | herbivory        | aquatic     | 1969                | 37              |
|                 | <i>Perca fluviatillis</i>        | <i>Daphnia spp.</i>             | predation        | aquatic     | 1969                | 36              |
| 14              | <i>Corydalis ambigua</i>         | <i>Bombus spp.</i>              | pollination      | terrestrial | 1999                | 14              |
| 4               | <i>Parus major</i>               | <i>Caterpillar spp.</i>         | predation        | terrestrial | 1961                | 36              |
|                 | <i>Ficedula albicollis</i>       | <i>Caterpillar spp.</i>         | predation        | terrestrial | 1962                | 34              |
|                 | <i>Caterpillar spp.</i>          | <i>Quercus robur</i>            | herbivory        | terrestrial | 1961                | 34              |
| 7               | <i>Parus major</i>               | <i>Operophtera brumata</i>      | predation        | terrestrial | 1961                | 32              |
| 26              | <i>Daphnia pulex</i>             | <i>Diatom spp.</i>              | herbivory        | aquatic     | 1977                | 25              |
| 13              | <i>Rangifer tarandus</i>         | <i>Plant spp.</i>               | herbivory        | terrestrial | 2002                | 10              |
| 2               | <i>Daphnia spp.</i>              | <i>Diatom spp.</i>              | herbivory        | aquatic     | 1979                | 25              |
|                 | <i>Thermocyclops oithonoides</i> | <i>Diatom spp.</i>              | herbivory        | aquatic     | 1985                | 16              |
| 10              | <i>Daphnia hyalina-galeata</i>   | <i>Asterionella spp.</i>        | herbivory        | aquatic     | 1956                | 26              |
| 11              | <i>Syrphid spp.</i>              | <i>Plant spp.</i>               | pollination      | terrestrial | 1992                | 19              |
| 19              | <i>Cyclops vicinus</i>           | <i>Phytoplankton spp.</i>       | herbivory        | aquatic     | 1974                | 14              |
| 20              | <i>Mnemiopsis leidyi</i>         | <i>Acartia hudsonica</i>        | predation        | aquatic     | 1951                | 8               |
| 25              | <i>Copepod spp.</i>              | <i>Diatom spp.</i>              | herbivory        | aquatic     | 1975                | 30              |
| 27              | <i>Daphnia spp.</i>              | <i>Diatom spp.</i>              | herbivory        | aquatic     | 1976                | 27              |
|                 | <i>Keratella cochlearis</i>      | <i>Diatom spp.</i>              | herbivory        | aquatic     | 1963                | 32              |
|                 | <i>Leptodiaptomus</i>            | <i>Diatom spp.</i>              | herbivory        | aquatic     | 1964                | 37              |

*ashlandi*

|    |                                  |                                  |             |             |      |    |
|----|----------------------------------|----------------------------------|-------------|-------------|------|----|
| 1  | <i>Glis glis</i>                 | <i>Ficedula albicollis</i>       | predation   | terrestrial | 1980 | 26 |
|    | <i>Glis glis</i>                 | <i>Parus caeruleus</i>           | predation   | terrestrial | 1980 | 26 |
|    | <i>Glis glis</i>                 | <i>Parus major</i>               | predation   | terrestrial | 1980 | 26 |
|    | <i>Glis glis</i>                 | <i>Sitta europaea</i>            | predation   | terrestrial | 1980 | 26 |
| 9  | <i>Rissa tridactyla</i>          | <i>Guillemots spp.</i>           | competition | terrestrial | 1973 | 23 |
| 17 | <i>Acrocephalus scirpaceus</i>   | <i>Acrocephalus arundinaceus</i> | competition | terrestrial | 1973 | 29 |
| 18 | <i>Pleurobrachia pileus</i>      | <i>Copepod spp.</i>              | predation   | aquatic     | 1976 | 27 |
|    | <i>Beroe gracilis</i>            | <i>Pleurobrachia pileus</i>      | predation   | aquatic     | 1976 | 27 |
| 5  | <i>Accipiter nisus</i>           | <i>Ficedula hypoleuca</i>        | predation   | terrestrial | 1985 | 16 |
|    | <i>Accipiter nisus</i>           | <i>Parus ater</i>                | predation   | terrestrial | 1985 | 16 |
|    | <i>Accipiter nisus</i>           | <i>Parus caeruleus</i>           | predation   | terrestrial | 1985 | 16 |
|    | <i>Accipiter nisus</i>           | <i>Parus major</i>               | predation   | terrestrial | 1985 | 16 |
|    | <i>Ficedula hypoleuca</i>        | <i>Caterpillar spp.</i>          | predation   | terrestrial | 1985 | 19 |
|    | <i>Parus ater</i>                | <i>Caterpillar spp.</i>          | predation   | terrestrial | 1985 | 20 |
|    | <i>Parus caeruleus</i>           | <i>Caterpillar spp.</i>          | predation   | terrestrial | 1985 | 20 |
|    | <i>Parus major</i>               | <i>Caterpillar spp.</i>          | predation   | terrestrial | 1985 | 20 |
|    | <i>Caterpillar spp.</i>          | <i>Quercus robur</i>             | herbivory   | terrestrial | 1988 | 17 |
| 23 | <i>Parus major</i>               | <i>Caterpillar spp.</i>          | herbivory   | terrestrial | 1996 | 16 |
|    | <i>Parus caeruleus</i>           | <i>Caterpillar spp.</i>          | herbivory   | terrestrial | 1998 | 14 |
| 3  | <i>Clamator glandarius</i>       | <i>Pica pica</i>                 | parasitism  | terrestrial | 2005 | 9  |
| 6  | <i>Alca torda</i>                | <i>Ammodytes marinus</i>         | predation   | aquatic     | 1983 | 24 |
|    | <i>Fratercula arctica</i>        | <i>Ammodytes marinus</i>         | predation   | aquatic     | 1983 | 24 |
|    | <i>Phalacrocorax aristotelis</i> | <i>Ammodytes marinus</i>         | predation   | aquatic     | 1983 | 24 |
|    | <i>Rissa tridactyla</i>          | <i>Ammodytes marinus</i>         | predation   | aquatic     | 1983 | 24 |
|    | <i>Uria aalge</i>                | <i>Ammodytes marinus</i>         | predation   | aquatic     | 1983 | 24 |

548 **Bibliographic information for studies used in analyses.**

549

- 550 1. Adamík, P., Král, M. Climate- and resource-driven long-term changes in dormice  
551 populations negatively affect hole-nesting songbirds. *J. Zool.* **275**, 209-215 (2008).
- 552 2. Adrian, R., Wilhelm, S., Gerten, D. Life-history traits of lake plankton species may govern  
553 their phenological response to climate warming. *Glob. Change Biol.* **12**, 652-661 (2006).
- 554 3. Avilés, J., Molina-Morales, M., Martinez, J. Climatic effects and phenological mismatch in  
555 cuckoo-host interactions: a role for host phenotypic plasticity in laying date? *Oikos.* **123**,  
556 993-1002 (2014).
- 557 4. Bauer, Z. *et al.* Changing climate and the phenological response of great tit and collared  
558 flycatcher populations in floodplain forest ecosystems in Central Europe. *Int. J. Biometeorol.*  
559 **54**, 99-111 (2010).
- 560 5. Both, C., van Asch, M., Bijlsma, R., van den Burg, A., Vissier, M. Climate change and  
561 unequal phenological changes across four trophic levels: constraints or adaptations? *J. Anim.*  
562 *Ecol.* **78**, 73-83 (2009).
- 563 6. Burthe, S. *et al.* Phenological trends and trophic mismatch across multiple levels of a North  
564 Sea pelagic food web. *Mar. Ecol. Prog. Ser.* **454**, 119-133 (2012).
- 565 7. Charmantier, A. *et al.* Adaptive Phenotypic Plasticity in Response to Climate Change in a  
566 Wild Bird Population. *Science.* **320**, 800-803 (2008).
- 567 8. Costello, J., Sullivan B, Gifford D. A physical-biological interaction underlying variable  
568 phenological responses to climate change by coastal zooplankton. *J. Plankton Res.* **28**, 1099-  
569 1105 (2006).
- 570 9. Durant, J. M., Krasnov, K. V., Nikolaeva, N. K., Stenseth, N. C. Within and between species  
571 competition in a seabird community: statistical exploration and modeling of time-series data.  
572 *Oecologia.* **169**, 685-694 (2012).
- 573 10. George, D. The effect of nutrient enrichment and changes in the weather on the abundance of  
574 *Daphnia* in Esthwaite Water, Cumbria. *Freshwater Biol.* **57**, 360-372 (2012).
- 575 11. Iler, A. M. *et al.* Maintenance of temporal synchrony between syrphid flies and floral  
576 resources despite differential phenological responses to climate. *Glob. Change Biol.* **19**,  
577 2348-2359 (2013).
- 578 12. Ivashov, A. V., Boyko, G. E., Simchuk, A. P. The role of host plant phenology in the  
579 development of the oak leafroller moth, *Tortrix viridana* L. (Lepidoptera: Tortricidae).  
580 *Forest Ecol. Manag.* **157**, 7-14 (2002).
- 581 13. Kerby, J. T., Post, E. Advancing plant phenology and reduced herbivore production in a  
582 terrestrial system associated with sea ice decline. *Nat. Commun.* **4**, 1-6 (2013).
- 583 14. Kudo G., Ida, T. Early onset of spring increases the phenological mismatch between plants  
584 and pollinators. *J. Ecol.* **94**, 2311-2320 (2013).
- 585 15. Lynch, H. J., Fagan, W. F., Naveen, R., Trivelpiece, S. G., Trivelpiece, W. Z. Differential  
586 advancement of breeding phenology in response to climate may alter staggered breeding  
587 among sympatric pygoscelid penguins. *Mar. Ecol. Prog. Ser.* **454**, 135-145 (2012).
- 588 16. McKinney, A. *et al.* Asynchronous changes in phenology of migrating Broad-tailed  
589 Hummingbirds and their early-season nectar resources. *Ecol. Appl.* **93**, 1987-1993 (2012).
- 590 17. Schaefer, T., Ledebur, G., Beier, J., Leisler, B. Reproductive responses of two related  
591 coexisting songbird species to environmental changes: global warming, competition, and  
592 population sizes. *J. Ornithol.* **147**, 47-56 (2006).

- 593 18. Schlüter, M. *et al.* Phenological shifts of three interacting zooplankton groups in relation to  
594 climate change. *Global Change Biol.* **16**, 3144-3153 (2010).
- 595 19. Seebens, H., Einsle, U., Straile, D. Copepod life cycle adaptations and success in response to  
596 phytoplankton spring bloom phenology. *Glob. Change Biol.* **15**, 1394-1404 (2009).
- 597 20. Sullivan, B., Costello, D., Van Keuren, D. Seasonality of the copepods *Antarctica hudsonica*  
598 and *Acartia tonsa* in Narragansett Bay, RI, USA during a period of climate change. *Estuar.*  
599 *Cost. Shelf Sci.* **73**, 259-267 (2007).
- 600 21. Thackeray, S. J. *et al.* Food web de-synchronization in England's largest lake: an assessment  
601 based on multiple phenological metrics. *Glob. Change Biol.* **19**, 3568-3580 (2013).
- 602 22. Votka, E., Orell, M., Rytönen, S. Warming climate advances breeding and improves  
603 synchrony of food demand and food availability in a boreal passerine. *Glob. Change Biol.* **17**,  
604 3002-3009 (2011).
- 605 23. Votka, E., Rytönen, S., Orell, M. Does the temporal mismatch hypothesis match in boreal  
606 populations? *Oecologia.* **176**, 595-605 (2014).
- 607 24. Watanuki, Y., Ito, M., Deguchi, T., Minobe, S. Climate-forced seasonal mismatch between  
608 the hatching of rhinoceros auklets and the availability of anchovy. *Mar. Ecol. Prog. Ser.* **393**,  
609 259-271 (2009).
- 610 25. Wiltshire, K. *et al.* Resilience of North Sea phytoplankton spring bloom dynamics: An  
611 analysis of long-term data at Helgoland Roads. *Limnol. Oceanogr.* **53**, 1294-1302 (2008).
- 612 26. Winder, M., Schindler, D. E. Climate change uncouples trophic interactions in an aquatic  
613 ecosystem. *Ecology.* **85**, 2100-2106 (2004).
- 614 27. Winder, M., Schindler, D. E. Climate effects on the phenology of lake processes. *Glob.*  
615 *Change Biol.* **10**, 1844-1856 (2004).
- 616

617 **Appendix S5. Stan code**

618 Model 1. Model used to estimate change in phenology, synchrony and temperature, and  
619 temperature sensitivity. We used default priors on all parameters (i.e. unconstrained priors:  
620 uniform(-∞,∞), except parameters declared with a lower bound of zero which were given the  
621 prior: uniform(0,∞)).

```
622 //Two-level partially pooling slope model
623
624 data {
625   int<lower=0> N;           //Level 1: Number of observations
626   int<lower=0> Nspp;       //Level 2: Number of groups (ex: species)
627   int species[N];        //Grouping factor identity (e.g. species)
628
629   vector[N] x;
630   real y[N];
631 }
632
633 parameters {
634   real mu_b;              //overall slope
635   real<lower=0> sigma_y;  //measurement error, noise etc. (overall sd)
636
637   real a[Nspp];          //the intercept for each group
638   real b[Nspp];          //the slope for each group
639   real<lower=0> sigma_b;  //variation of slope among groups; [sd of random effects]
640 }
641
642 transformed parameters {
643   real ypred[N];
644
645   for (i in 1:N) {
646     ypred[i]=a[species[i]]+b[species[i]]*x[i];
647   }
648 }
649
650 model {
651   b~normal(mu_b, sigma_b);
652   y~normal(ypred, sigma_y);
653 }
654
```

655 Model 2. Model used to estimate the overall response in the magnitude of synchrony change. We  
656 used default priors on all parameters (i.e. unconstrained priors:  $\text{uniform}(-\infty, \infty)$ ), except parameters  
657 declared with a lower bound of zero which were given the prior:  $\text{uniform}(0, \infty)$ .  
658

```
659 //Two-level intercepts only model with truncated distribution
660
661 data{
662   int<lower=0> N;      //Level 1: Number of observations
663   int<lower=0> Nint;  //Level 2: Number of groups (e.g. interactions)
664   int species[N];    //Grouping factor identity
665
666   real y[N];
667 }
668
669 parameters{
670   real<lower=0> mu_a;      //overall intercept
671   real<lower=0> sigma_y;  //measurement error, noise etc. (overall sd)
672   real<lower=0> a[Nint];  //the intercept for each interaction
673   real<lower=0> sigma_a;  //variation of intercepts among interactions;
674 }
675
676 transformed parameters{
677   real ypred[N];
678
679   for (i in 1:N){
680     ypred[i]<-a[species[i]];
681   }
682 }
683
684 model{
685   a~normal(mu_a, sigma_a);
686   y~normal(ypred, sigma_y);
687 }
```

688 Model 3. Model used to estimate the relationship between temperature change and change in  
689 phenology across interactions (i.e. covariate models). We used default priors on all parameters  
690 (i.e. unconstrained priors: uniform( $-\infty, \infty$ ), except parameters declared with a lower bound of zero  
691 which were given the prior: uniform( $0, \infty$ )).

```
692 //Two-level partially pooling intercept model where slopes do not vary
693
694
695 data {
696   int<lower=0> N;          //Level 1: Number of observations
697   int<lower=0> Nspp;      //Level 2: Number of groups
698   int species[N];        // Grouping factor identity
699
700   vector[N] x;
701   real y[N];
702 }
703
704 parameters {
705   real mu_a;             //overall intercept
706   real mu_b;             //overall slope
707   real<lower=0> sigma_y; //measurement error, noise etc. (overall sd)
708   real a[Nspp];         //the intercept for each group
709   real<lower=0> sigma_a; //variation of intercept among groups;
710 }
711
712 transformed parameters {
713   //Individual mean
714   real ypred[N];
715
716   //Individual mean
717   for (i in 1:N){
718     ypred[i] <- a[species[i]] + mu_b * x[i];
719   }
720 }
721
722 model {
723   a ~ normal(mu_a, sigma_a);
724   y ~ normal(ypred, sigma_y);
725 }
726
```



727 Model 4. Model used to estimate the relationship between temperature change and change in  
728 synchrony across interactions (i.e. covariate models). We used default priors on all parameters  
729 (i.e. unconstrained priors: uniform( $-\infty, \infty$ ), except parameters declared with a lower bound of zero  
730 which were given the prior: uniform( $0, \infty$ )).

```
731 //Two-level partially pooling intercept model where slopes do not vary
732
733 data{
734   int<lower=0> N;      //Level 1: Number of observations
735   int<lower=0> Nsp;   //Level 2: Grouping factor
736   int species[N];    //Grouping factor identity
737
738   vector[N] x;
739   real y[N];
740 }
741
742 parameters{
743   real<lower=0> mu_a; //overall intercept
744   real mu_b;        //overall slope
745   real<lower=0> sigma_y; //measurement error, noise etc. (overall sd)
746   real<lower=0> a[Nsp]; //the intercept for each group
747   real<lower=0> sigma_a; //variation of intercept among groups; [sd]
748 }
749
750 transformed parameters{
751   real ypred[N];
752
753   for (i in 1:N){
754     ypred[i]<-a[species[i]]+mu_b*x[i];
755   }
756 }
757
758 model{
759   a~normal(mu_a, sigma_a);
760   y~normal(ypred, sigma_y);
761 }
```
